# Supplementary material
Source: PubMed Central journal article supplement (PMC6889962)
Supplement: NIHMS1023979-supplement-suppl.pdf [file NIHMS1023979-supplement-suppl.pdf]

## Imaging lymphoid cell death *in vivo* during polymicrobial sepsis

Lin Zou, MD<sup>1</sup>§; Howard H. Chen, PhD<sup>2</sup>§; Dan Li, MD<sup>1</sup>; Ganqiong Xu, MD<sup>1</sup>; Yan Feng, MD, PhD<sup>1</sup>; Chan Chen, MD, PhD<sup>1</sup>; Larry Wang, MD<sup>3</sup>; David E. Sosnovik, MD<sup>2</sup>; Wei Chao, MD, PhD<sup>1</sup>

1. Department of Anesthesia, Critical Care and Pain Medicine, Massachusetts General Hospital, Harvard Medical School, Boston, MA

2. Martinos Center for Biomedical Imaging, Department of Radiology, Massachusetts General Hospital, Harvard Medical School, Boston, MA

3. Pathology and Laboratory Medicine, Children's Hospital Los Angeles, Los Angeles, CA

§These authors contribute equally.

### Supplement materials

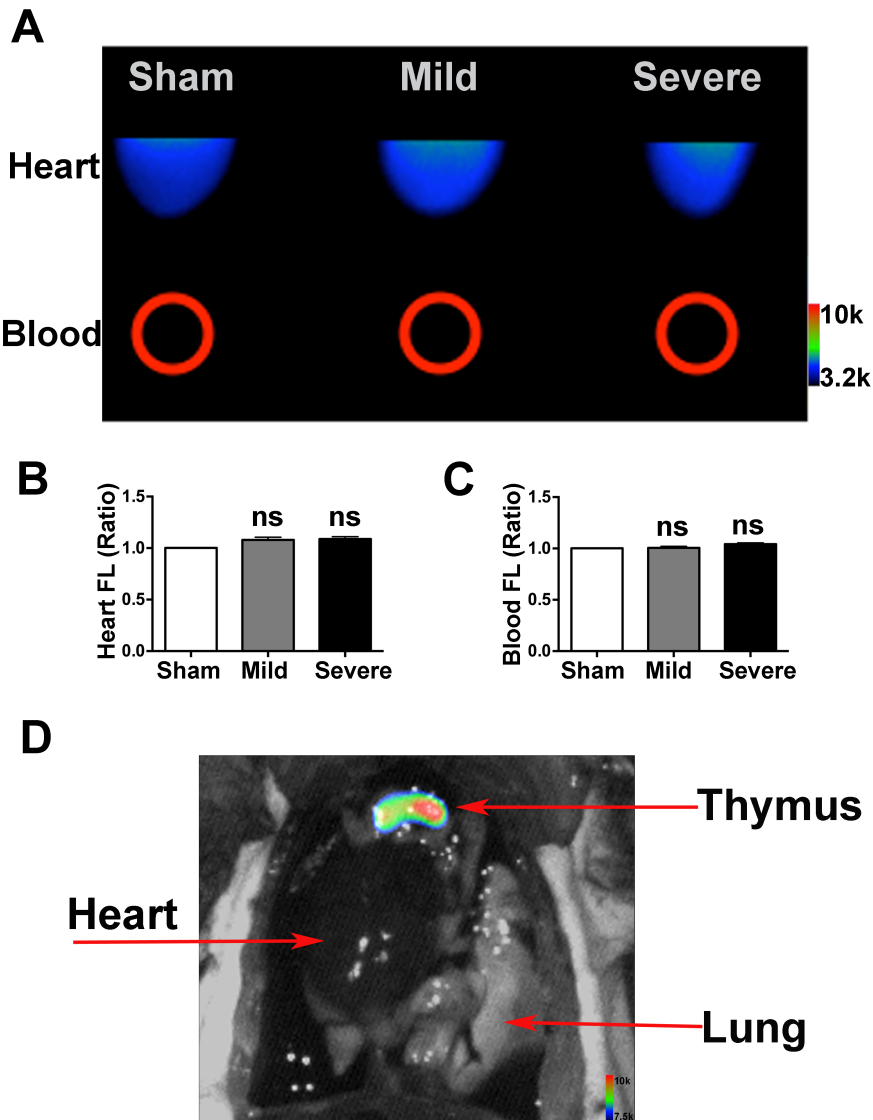

**Supplement Fig. 1: Heart and blood were imaged *ex vivo* for Annexin V fluorescence.** After *in vivo* imaging acquisition, hearts and blood were harvested and imaged on IVIS Spectrum. **A.** Representative Annexin V fluorescence in the intact heart and blood *ex vivo*. Background fluorescence was seen diffusely in the sham, mild and severe sepsis hearts (top panel). Blood was collected by cardiac puncture and placed in Eppendorf tubes for imaging. An ROI (red circle, bottom panel) was placed over the center of each tube containing blood. Note the lack of detectable Annexin V fluorescence in the blood in sham, mild and severe animals. **B-C.** Annexin V fluorescence signal *ex vivo* is quantified as ratio over sham. Annexin V fluorescence in both the heart and blood was similar among the sham group (n=4), mild-CLP group (n=5), and the severe-CLP group (n=5). FL=fluorescence; ns= no significant difference,  $P>0.05$ , One way ANOVA. **D.** Euthanized septic mouse chest was opened immediately after *in vivo* image acquisition. Annexin V fluorescent and white light images were collected, respectively. Annexin V fluorescence was fused with white light images for anatomical context, which heart, lung and thymus are discernible in addition to the muscle and fat layer. Robust localized fluorescent signal in the thymus and nowhere in the chest cavity was shown.
